# The American Journal of Psychotherapy

APA's journal of psychotherapy practice and research

Since 1947, the *American Journal of Psychotherapy* has provided a forum for advancing the theory, science, and clinical practice of psychotherapy, publishing articles that expand understanding of psychotherapies, especially in the domains of efficacy, process, education, and practice. The journal provides authors and readers the opportunity to engage fully in pressing psychotherapy issues such as defining core elements of psychotherapies, dissemination of evidence-based practices, scaling best practices for expansion to larger populations, understanding mechanisms of change, and evaluating best practices for psychotherapy training and supervision. As part of APA Publishing's portfolio of journals, the *American Journal of Psychotherapy* is the ideal vehicle to disseminate knowledge about psychotherapy and send a message that psychotherapy remains firmly within the purview of psychiatry.

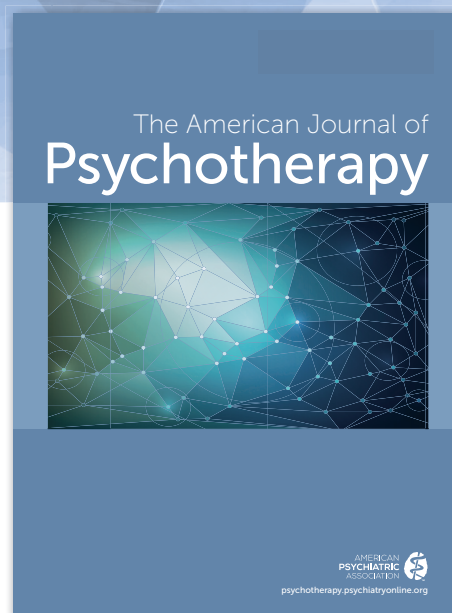

Holly A. Swartz, M.D., Editor-in-Chief

Frequency: Quarterly

Online ISSN: 2575-6559

[psychotherapy.psychiatryonline.org](http://psychotherapy.psychiatryonline.org)

Check out the most discussed and downloaded papers of those recently published:

- Connection During COVID-19: Pilot Study of a Telehealth Group Parenting Intervention
  - Developing a Structural Intervention for Outpatient Mental Health Care: Mapping Vulnerability and Privilege
  - “Know Thyself”: Supporting Personal Psychotherapy During Psychiatry Residency
- To receive updates on new content, follow the journal on  Twitter (@APAPubJournals) and sign up for free publication alerts at [psychiatryonline.org](http://psychiatryonline.org)
- **Visit our website** for more information about the journal and topic areas for which submissions are especially welcome.

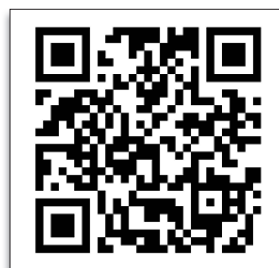

AMERICAN  
PSYCHIATRIC  
ASSOCIATION  
PUBLISHING

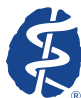

[appi.org](http://appi.org)  
1-800-368-5777  
[appi@psych.org](mailto:appi@psych.org)

[psychotherapy.psychiatryonline.org](http://psychotherapy.psychiatryonline.org)

AH2310A

# Telepsychiatry is transforming mental healthcare; but with new technology comes new risks.

With data breaches and cyber attacks becoming increasingly common, having the right cyber protection in place is critical. Whether you are in private practice or work within an organization, psychiatrists who maintain confidential patient / employee information have a responsibility to safeguard that data.

**Cyber Suite** through American Professional Agency, Inc., is an endorsement to your professional liability coverage.

It's simple to add with no lengthy forms to fill out.

**American Psychiatric Association Endorsed Professional Liability Insurance Program**

Adding the Cyber Suite endorsement is fast and easy.

Learn more about Cyber Suite at [AmericanProfessional.com/cyber-suite-PRO](http://AmericanProfessional.com/cyber-suite-PRO) or call (800) 421-6694 Ext. 2318.

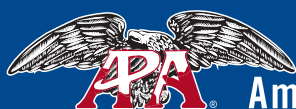

**American Professional Agency**

LEADERS IN PSYCHIATRIC MEDICAL LIABILITY INSURANCE

ENDORSED BY THE

AMERICAN  
PSYCHIATRIC  
ASSOCIATION

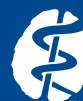

Source: http://ajp.psychiatryonline.org/doi/suppl/10.1176/ajp.2023.180.issue-3/suppl_file/back.pdf
