# The American Journal of Psychiatry

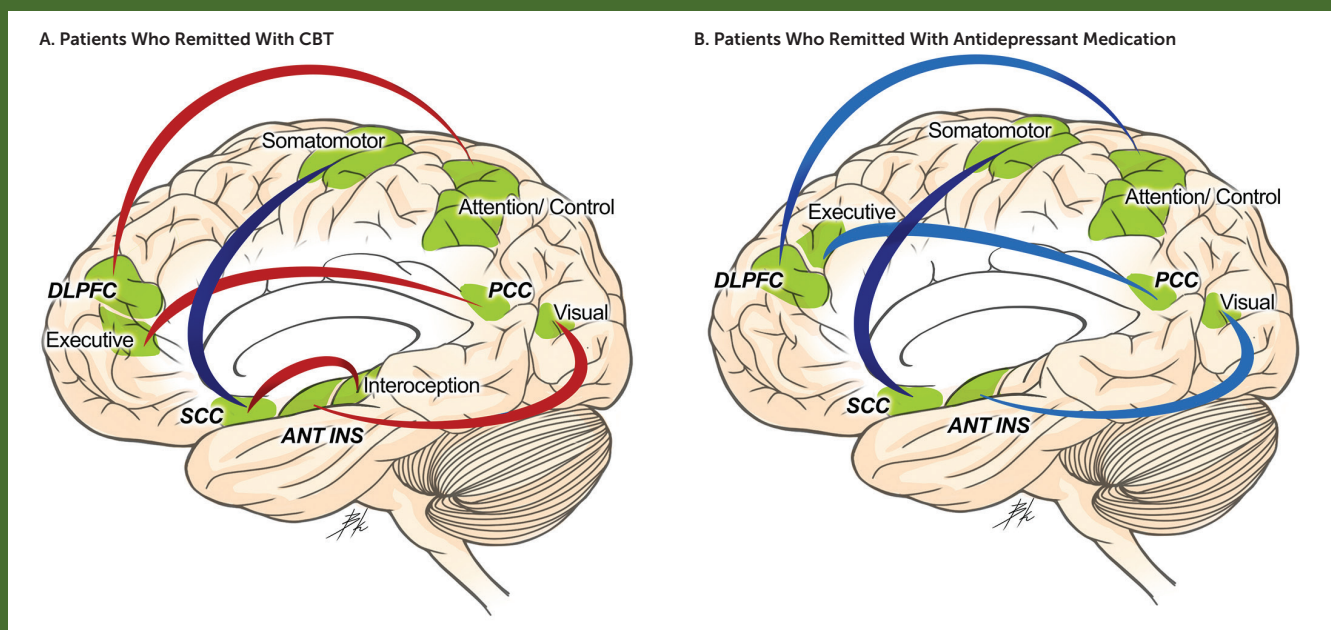

Shared and Unique Changes in Brain Connectivity Among Depressed Patients After Remission With Pharmacotherapy Versus Psychotherapy

Pharmacotherapies for Treatment-Resistant Depression: How Antipsychotics Fit in the Rapidly Evolving Therapeutic Landscape

Moderate Alcohol Consumption and Depression: A Marginal Structural Model Approach Promoting Causal Inference

Adjunctive Cariprazine for the Treatment of Patients With Major Depressive Disorder
